# Supplementary material for: Fluoxetine and Sertraline Potently Neutralize the Replication of Distinct SARS-CoV-2 Variants
Source: MDPI journal article supplement (doi:10.3390/v16040545), 2024-03-30
Supplement: s1 [file s1]

**Table S1: Primers used for mutagenesis and sequencing.**

| <b>Mutation</b> | <b>Mutagenesis primers</b>                                     | <b>Sequencing primers</b>     |
|-----------------|----------------------------------------------------------------|-------------------------------|
| R346K           | Fw: AATGCCACCAaATTGCCTCTG<br>Rev: GAACACCTCGCCGAAGGG           | Fw:<br>GTGGATTGTGCCCTTGATCCTC |
| K417N           | Fw: AGACAGGCAAaATCGCCGACTAC<br>Rev: GTCCAGGGGCAATCTGCG         | Fw: CAGCTTCAGCACCTTCAAG       |
| K417T           | Fw: CAGACAGGCAcGATCGCCGAC<br>Rev: TCCAGGGGCAATCTGCCG           | Fw: CAGCTTCAGCACCTTCAAG       |
| L452Q           | Fw: TACAATTACCaGTACCGGCTGTTCC<br>Rev: GTTGCCGCCGACTTTGGA       | Fw: CAGCTTCAGCACCTTCAAG       |
| L452R           | Fw: TACAATTACCgGTACCGGCTGTTC<br>Rev: GTTGCCGCCGACTTTGGA        | Fw: CAGCTTCAGCACCTTCAAG       |
| T478K           | Fw: GCCGGCAGCAaaCCTTGTAACG<br>Rev: CTGATAGATCTCGGTGGAG         | Fw: CAGCTTCAGCACCTTCAAG       |
| E484K           | Fw:<br>TAACGGCGTGaAAGGCTTCAACTGCTAC<br>Rev: CAAGGGGTGCTGCCGGCC | Fw: CAGCTTCAGCACCTTCAAG       |
| F490S           | Fw: AACTGCTACTcCCCACTGCAG<br>Rev: GAAGCCTTCCACGCCGTT           | Fw: CAGCTTCAGCACCTTCAAG       |
| N501Y           | Fw: TCAGCCCACAaATGGCGTGGG<br>Rev: AAGCCGTAGGACTGCAGTG          | Fw: CAGCTTCAGCACCTTCAAG       |

**Table S2. Mutations in respective plasmids and corresponding SARS-CoV-2 variant.**

| <b>Plasmid</b>                      | <b>RBD mutations</b> | <b>Non-RBD mutations</b>                                                                      | <b>Corresponding SARS-CoV-2 variant(s)</b> |
|-------------------------------------|----------------------|-----------------------------------------------------------------------------------------------|--------------------------------------------|
| pCG1-SARS-S-del18                   | -                    | 18aa deletion in c-terminal tail                                                              | Wuhan-Hu-1 (Wt)                            |
| pCG1-SARS-S-del18_N501Y             | N501Y                | 18aa deletion in c-terminal tail                                                              | B.1.1.7 (alpha) – RBD only                 |
| pCG1-SARS-S-del18_K417N-E484K-N501Y | K417N, E484K, N501Y  | 18aa deletion in c-terminal tail                                                              | B.1.351 (beta) – RBD only                  |
| pCG1-SARS-S-del18_K417T-E484K-N501Y | K417N, E484K, N501Y  | 18aa deletion in c-terminal tail                                                              | P.1 (gamma) – RBD only                     |
| pCG1-SARS-S-del18_L452R-T478K       | L452R, T478K         | 18aa deletion in c-terminal tail                                                              | B.1.617.2 (delta) – RBD only               |
| pCG1-SARS-S-del18_L452Q-F490S       | L452Q, F490S         | 18aa deletion in c-terminal tail                                                              | C.37 (lambda) – RBD only                   |
| pCG1-SARS-S-del18_R346K-E484K-N501Y | R346K, E484K, N501Y  | 18aa deletion in c-terminal tail                                                              | B.1.621 (mu) – RBD only                    |
| pCDNA3.3_CoV2_D18                   | -                    | 18aa deletion in c-terminal tail                                                              | Wuhan-Hu-1 (Wt)                            |
| pCDNA3.3_CoV2_B.1.1.7               | N501Y                | 69-70del, 144del, A570D, D614G, P681H, T716I, S982A, D1118H, 18aa deletion in c-terminal tail | B.1.1.7 (alpha)                            |

|                                                          |                                                                                                  |                                                                                                                                                                                  |                     |
|----------------------------------------------------------|--------------------------------------------------------------------------------------------------|----------------------------------------------------------------------------------------------------------------------------------------------------------------------------------|---------------------|
| pCDNA3.3_CoV2_501V2                                      | K417N, E484K, N501Y                                                                              | L18F, D80A, D215G, R246I, D614G, A7801V, 18aa deletion in c-terminal tail                                                                                                        | B.1.351 (beta)      |
| pCDNA3.3_CoV2_P1                                         | K417N, E484K, N501Y                                                                              | L18F, T20N, P26S, D138Y, R190S, D614G, H655Y, T1027I, 18aa deletion in c-terminal tail                                                                                           | P.1 (gamma)         |
| pCDNA3.3-SARS2-B.1.617.2                                 | L452R, T478K                                                                                     | T19R, 156G, 157-158del, D614G, P681R, D950N, 18aa deletion in c-terminal tail                                                                                                    | B.1.617.2 (delta)   |
| SARS-CoV-2 Omicron Strain S gene Human codon_pcDNA3.1(+) | G339D, S371L, S373P, S375F, K417N, N440K, G446S, S477N, T478K, E484A, Q493R, G498R, N501Y, Y505H | A67V, 67-68del, T95I, G142D, 143-145del, N211I, 212del, ins215EPE, T547K, D614G, H655Y, N679K, P681H, N764K, D796Y, N856K, Q954H, N969K, L918F, 18aa deletion in c-terminal tail | B.1.1.529 (omicron) |

**Table S3. M- and N-gene-specific primers used for RT-qPCR.**

| <b>Primer</b>                 | <b>Sequence (5' - 3')</b>     |
|-------------------------------|-------------------------------|
| M-gene fwd                    | tgtgacatcaaggacctgcc          |
| M-gene rev                    | ctgagtcacctgctacacgc          |
| M-gene probe (PMID 32575728)  | FAM-tgttgctacatcacgaacgc-BHQ1 |
| N-gene fwd (pWhSF-N-F9)       | acattggcaccgcgaatc            |
| N-gene rev (pWhSF-N-R10)      | cgagaagaggcttgactgcc          |
| N-gene probe (pWhSF-N-P11lna) | FAM-cct+caaggaa+caa+catt-BHQ1 |

(+ = LNA (locked nucleic acid) modified)
